# Supplementary material
Source: ML conference proceedings conference paper supplement (https://openaccess.thecvf.com/content/ICCV2021/html/Zhang_STAR_A_Structure-Aware_ICCV_2021_paper.html)
Supplement: Supplementary file 1 [file Zhang_STAR_A_Structure-Aware_ICCV_2021_supplemental.pdf]

## A. Additional Qualitative Results

In this section we show more qualitative results on illumination enhancement and photo retouching to compare STAR and CNN backbones. The codes and full results will be released in the future.

### A.1. Illumination Enhancement Results

Fig. 1 give additional illumination results on FiveK [1] datasets. The same to Section 4.1, DCE-Net and DCE-Net<sub>D</sub> here denote original pixel-wise implementation of [2] and its downsampled form (predicting token-wise curve like STAR). As Fig. 1 shows, compared to CNN backbone, STAR can yield high quality results which are much closer to the references, with only 13% float operations.

### A.2. Photo Retouching Results

In Fig. 2 we show more photo retouching results. As shown, compared to [4], semantic methods deliver both higher quantitative results and better image perceptual quality. Note that CNN<sub>semantic</sub> methods can achieve comparable results to the proposed STAR, but at cost of much more computations (0.29G FLOPS vs. 0.04G FLOPS).

## B. Typo Correction

We are sorry that there's a typo in Figure.6 of the submitted main text. The Complexity of CNN<sub>semantic</sub> is 0.29G FLOPS (the same to Table.5) rather than 0.21G GFLOPS. We will correct it in future version.

## References

- [1] Vladimir Bychkovsky, Sylvain Paris, Eric Chan, and Frédo Durand. Learning photographic global tonal adjustment with a database of input/output image pairs. In *CVPR 2011*, pages 97–104. IEEE, 2011. 1, 2
- [2] Chunle Guo, Chongyi Li, Jichang Guo, Chen Change Loy, Junhui Hou, Sam Kwong, and Runmin Cong. Zero-reference deep curve estimation for low-light image enhancement. In *Proceedings of the IEEE/CVF Conference on Computer Vision and Pattern Recognition*, pages 1780–1789, 2020. 1
- [3] Samuel W Hasinoff, Dillon Sharlet, Ryan Geiss, Andrew Adams, Jonathan T Barron, Florian Kainz, Jiawen Chen, and Marc Levoy. Burst photography for high dynamic range and low-light imaging on mobile cameras. *ACM Transactions on Graphics (TOG)*, 35(6):1–12, 2016. 3
- [4] Hui Zeng, Jianrui Cai, Lida Li, Zisheng Cao, and Lei Zhang. Learning image-adaptive 3d lookup tables for high performance photo enhancement in real-time. *IEEE Transactions on Pattern Analysis and Machine Intelligence*, 2020. 1

108  
109  
110  
111  
112  
113  
114  
115  
116  
117  
118  
119  
120  
121  
122  
123  
124  
125  
126  
127  
128  
129  
130  
131  
132  
133  
134  
135  
136  
137  
138  
139  
140  
141  
142  
143  
144  
145  
146  
147  
148  
149  
150  
151  
152  
153  
154  
155  
156  
157  
158  
159  
160  
161

162  
163  
164  
165  
166  
167  
168  
169  
170  
171  
172  
173  
174  
175  
176  
177  
178  
179  
180  
181  
182  
183  
184  
185  
186  
187  
188  
189  
190  
191  
192  
193  
194  
195  
196  
197  
198  
199  
200  
201  
202  
203  
204  
205  
206  
207  
208  
209  
210  
211  
212  
213  
214  
215

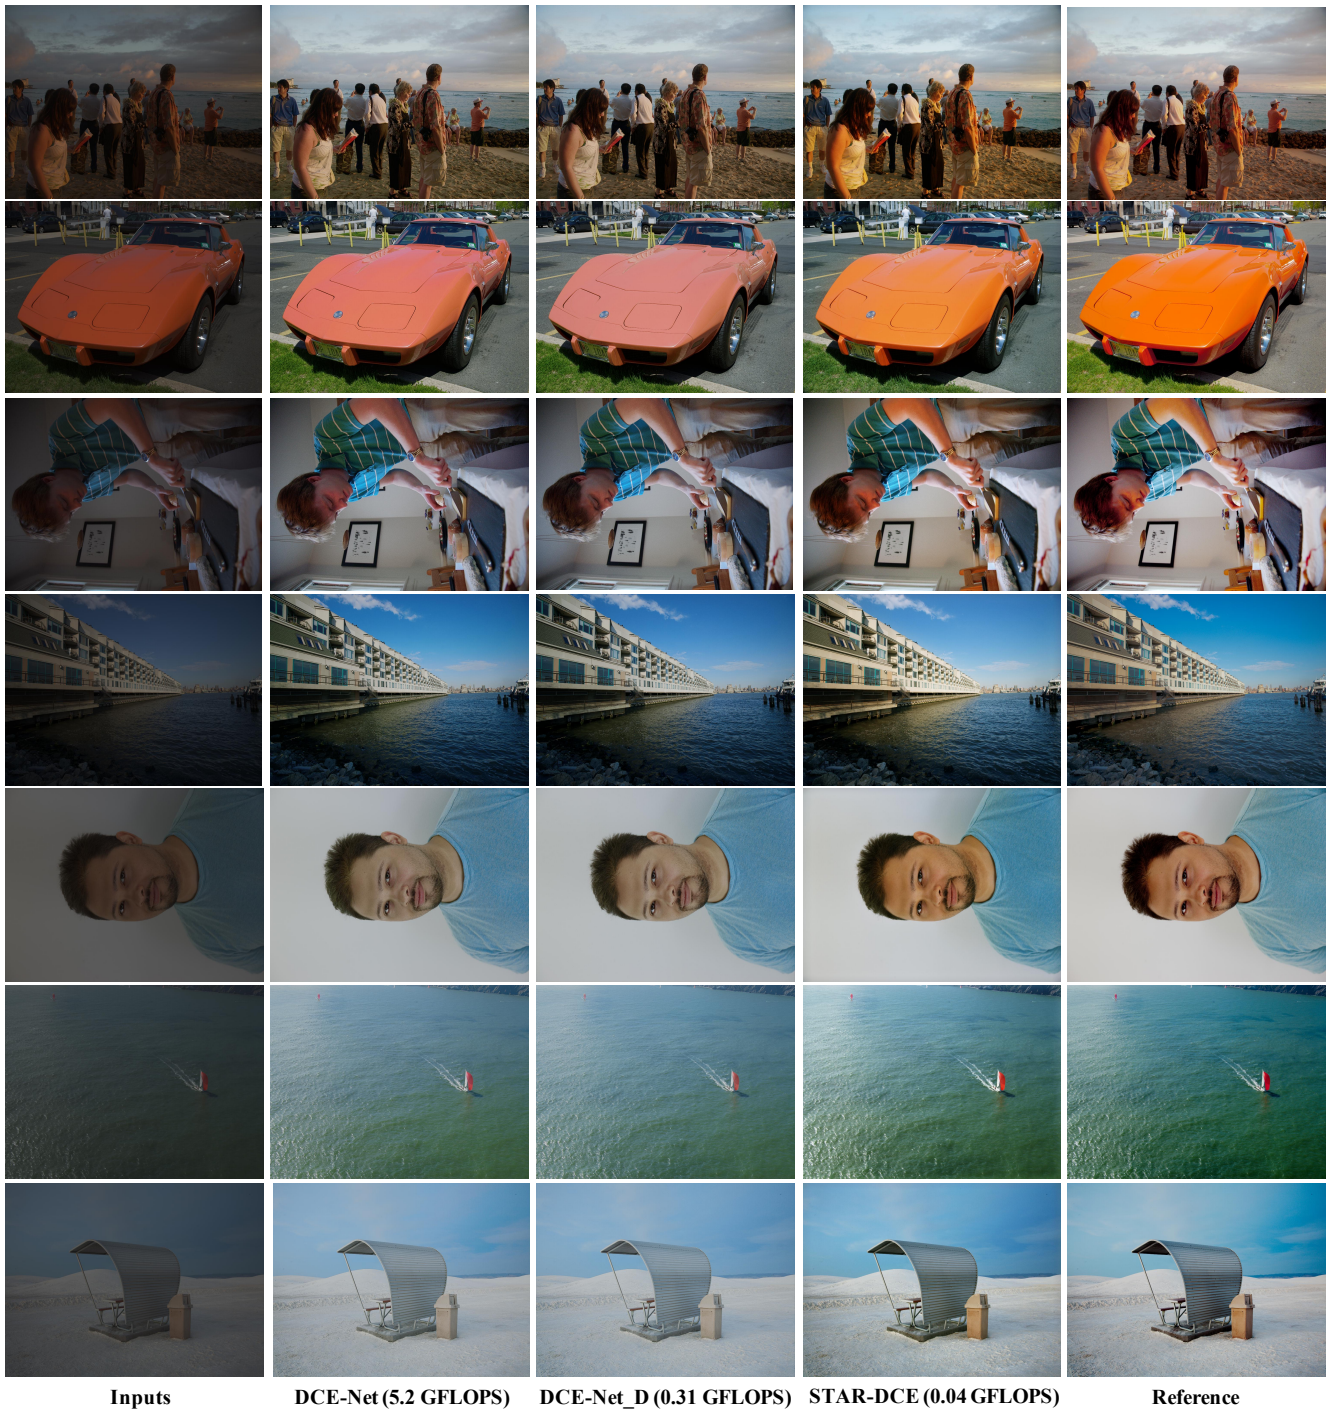

Figure 1. Visual comparison of illumination enhancement on MIT-Adobe FiveK [1].

216  
217  
218  
219  
220  
221  
222  
223  
224  
225  
226  
227  
228  
229  
230  
231  
232  
233  
234  
235  
236  
237  
238  
239  
240  
241  
242  
243  
244  
245  
246  
247  
248  
249  
250  
251  
252  
253  
254  
255  
256  
257  
258  
259  
260  
261  
262  
263  
264  
265  
266  
267  
268  
269

270  
271  
272  
273  
274  
275  
276  
277  
278  
279  
280  
281  
282  
283  
284  
285  
286  
287  
288  
289  
290  
291  
292  
293  
294  
295  
296  
297  
298  
299  
300  
301  
302  
303  
304  
305  
306  
307  
308  
309  
310  
311  
312  
313  
314  
315  
316  
317  
318  
319  
320  
321  
322  
323

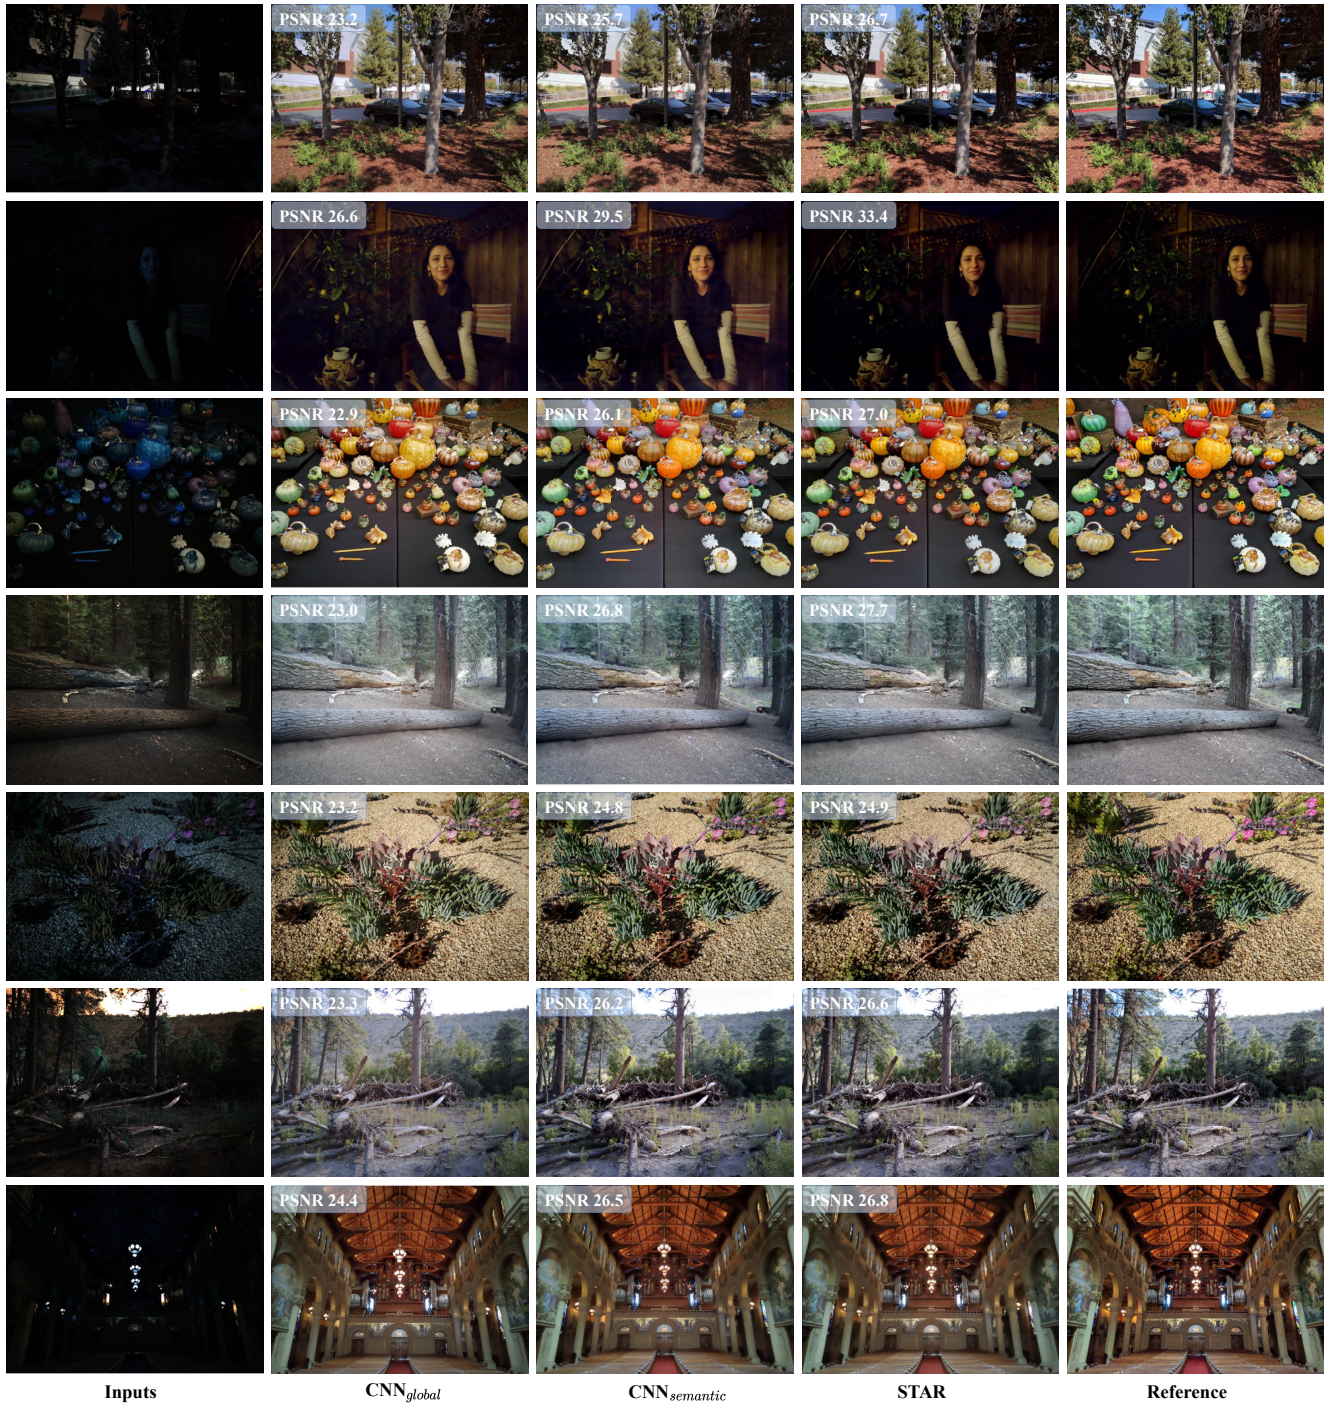

Figure 2. Visual comparison of photo retouching on HDR+ [3]. We mark PSNR on all results.
